# Supplementary material for: Nanoporous organic layered crystals of double-headed bis(trifluorolactate)s. Hydrogen-bonded systematic crystal structures controlled by the symmetries of molecular components
Source: Royal Society of Chemistry journal article supplement (doi:10.1039/b512051a), 2006-01-01
Supplement: b512051a.pdf [file b512051a.pdf]

**Nanoporous organic layered crystals of double-headed bis(trifluorolactate)s.  
Hydrogen-bonded systematic crystal structures controlled by the  
symmetries of molecular components.**

Satoshi Takahashi, Toshimasa Katagiri\* and Kenji Uneyama

3-1-1, Tsushimanaka, Okayama, Japan. Fax: 81-086-251-8021; Tel: 81-086-251-8605;  
E-mail: tkata@cc.okayama-u.ac.jp

**Electronic Supplementary Information (ESI)**

- (i) Compound data for (*S,S*)-**3**
- (ii) ORTEP plots for **3**
- (iii) Additional figures of **3**
- (iv) <sup>1</sup>H NMR spectra of dissolved crystals **3f**, **3g**, and **4f** in CDCl<sub>3</sub>
- (v) TG curves of inclusion compounds **3f**, **3g**, and **4f**

### Synthesis of double-headed (*S,S*)-bis(trifluorolactate)s **3**

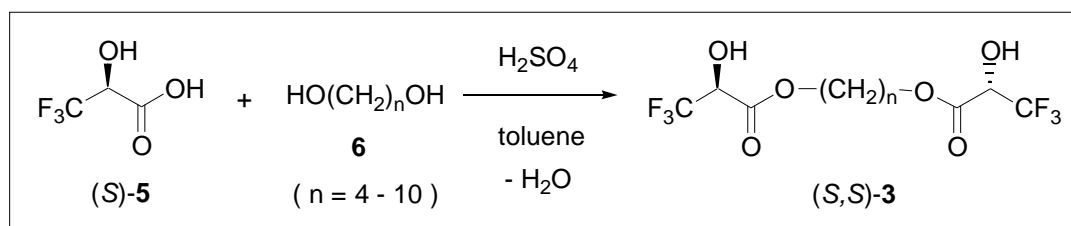

Typical synthetic procedure for **3** and the compound data for **3a** are described in the experimental section.

**Pentamethylene-(*S,S*)-bis(3,3,3-trifluorolactate) [(*S,S*)-**3b**]:** 78% yield. Colourless crystal. Mp 100-101 °C. IR (KBr): 3432, 2968, 1754, 1742, 1462, 1134 cm<sup>-1</sup>. <sup>1</sup>H NMR (CDCl<sub>3</sub>): δ 4.48 (quintet, *J* = 7.2 Hz, 2H), 4.39 (dt, *J*<sub>1</sub> = 10.8 Hz, *J*<sub>2</sub> = 6.6 Hz, 2H), 4.29 (dt, *J*<sub>1</sub> = 10.8 Hz, *J*<sub>2</sub> = 6.6 Hz, 2H), 3.47 (d, *J* = 7.8 Hz, 2OH), 1.71-1.82 (m, 4H), 1.41-1.53 (m, 2H). <sup>19</sup>F NMR (CDCl<sub>3</sub>): δ 85.0 (d, *J* = 7.2 Hz, 6F). <sup>13</sup>C NMR (CD<sub>3</sub>OD): δ 168.2, 124.4 (q, *J* = 281 Hz), 71.2 (q, *J* = 32 Hz), 67.1, 28.9, 23.0. MS: *m/z* 145 (1), 99 (4), 69 (100), 68 (17), 51(5), 41(49); Anal. Calcd for C<sub>11</sub>H<sub>14</sub>F<sub>6</sub>O<sub>6</sub>: C 37.09, H, 3.96, Found: C 36.83, H, 4.19. [α]<sub>D</sub><sup>25</sup> -6.61 (*c* 1.0, acetone).

**Hexamethylene-(*S,S*)-bis(3,3,3-trifluorolactate) [(*S,S*)-**3c**]:** 80% yield. Colourless crystal. Mp 113-114 °C. IR (KBr): 3444, 2980, 1750, 1738, 1228, 1130 cm<sup>-1</sup>. <sup>1</sup>H NMR (CDCl<sub>3</sub>): δ 4.48 (q, *J* = 7.2 Hz, 2H), 4.36 (dt, *J*<sub>1</sub> = 10.8 Hz, *J*<sub>2</sub> = 6.6 Hz, 2H), 4.30 (dt, *J*<sub>1</sub> = 10.8 Hz, *J*<sub>2</sub> = 6.6 Hz, 2H), 1.65-1.80 (m, 4H), 1.35-1.50 (m, 4H), OHs were not observed. <sup>19</sup>F NMR (CDCl<sub>3</sub>): δ 85.0 (d, *J* = 6.9 Hz, 6F). <sup>13</sup>C NMR (CDCl<sub>3</sub>): δ 167.5, 122.2 (q, *J* = 282 Hz), 69.8 (q, *J* = 32.5 Hz), 67.3, 28.1, 25.0. MS: *m/z* 145 (2), 127 (5), 117 (1), 99 (9), 83 (80), 67 (34), 55 (100); Anal. Calcd for C<sub>12</sub>H<sub>16</sub>F<sub>6</sub>O<sub>6</sub>: C 38.93, H 4.36, Found: C 38.8, H 4.5. [α]<sub>D</sub><sup>25</sup> -5.80 (*c* 1.1, acetone).

**Heptamethylene-(*S,S*)-bis(3,3,3-trifluorolactate) [(*S,S*)-**3d**]:** 92% yield. Colourless crystal. Mp 93-94 °C. IR (KBr): 3448, 2952, 2872, 1750, 1740, 1270, 1190, 1132 cm<sup>-1</sup>. <sup>1</sup>H NMR (CDCl<sub>3</sub>): δ 4.48 (quintet, *J* = 6.6 Hz, 2H), 4.35 (dt, *J*<sub>1</sub> = 10.8 Hz, *J*<sub>2</sub> = 6.6 Hz, 2H), 4.29 (dt, *J*<sub>1</sub> = 10.5 Hz, *J*<sub>2</sub> = 6.6 Hz, 2H), 3.51 (d, *J* = 6.9 Hz, 2OH), 1.6-1.8 (m, 4H), 1.25-1.45 (m, 6H). <sup>19</sup>F NMR (CDCl<sub>3</sub>): δ 85.0 (d, *J* = 6.9 Hz, 6F). <sup>13</sup>C NMR (CDCl<sub>3</sub>): δ 167.5, 122.2 (q, *J* = 284 Hz), 69.8 (q, *J* = 32.1 Hz), 67.5, 28.4, 28.1, 25.3. MS: *m/z* 141 (2), 99 (4), 98 (4), 97 (48), 81 (11), 69 (19), 68 (29), 67 (19), 55

(100), 41 (25); Anal. Calcd for C<sub>13</sub>H<sub>18</sub>F<sub>6</sub>O<sub>6</sub>: C 40.63, H, 4.72, Found: C 40.79, H, 5.0.  $[\alpha]^{25}_{\text{D}}$  -4.33 (*c* 1.1, acetone).

**Octamethylene-(*S,S*)-bis(3,3,3-trifluorolactate) [(*S,S*)-3e]:** 90% yield. Colourless crystal. Mp 71-72 °C. IR (KBr): 3452, 2948, 1750, 1734, 1224, 1198, 1134 cm<sup>-1</sup>. <sup>1</sup>H NMR (CDCl<sub>3</sub>): δ 4.47 (quintet, *J* = 7.2 Hz, 2H), 4.36 (dt, *J*<sub>1</sub> = 10.5 Hz, *J*<sub>2</sub> = 6.6 Hz, 2H), 4.30 (dt, *J*<sub>1</sub> = 10.8 Hz, *J*<sub>2</sub> = 6.6, 2H), 3.41 (d, *J* = 7.8 Hz, 2OH), 1.71 (quintet, *J* = 6.6 Hz, 4H), 1.35 (brs, 8H). <sup>19</sup>F NMR (CDCl<sub>3</sub>): δ 85.0 (d, *J* = 6.9 Hz, 6F). <sup>13</sup>C NMR (CDCl<sub>3</sub>): δ 167.5, 122.2 (q, *J* = 284 Hz), 69.7 (q, *J* = 33.3 Hz), 67.6, 28.7, 28.1, 25.3. MS: *m/z* 145 (1), 129 (1), 111 (21), 110 (12), 98 (8), 95 (7), 83 (10), 82 (41), 81 (22), 69 (100), 68 (31), 67 (42), 56 (10), 55 (84), 54 (37), 43 (16), 42 (16), 41 (62); Anal. Calcd for C<sub>14</sub>H<sub>20</sub>F<sub>6</sub>O<sub>6</sub>: C 42.22, H 5.06, Found: C 42.0, H 5.29.  $[\alpha]^{25}_{\text{D}}$  -4.38 (*c* 1.1, acetone). The ee was determined to be >99% ee by HPLC analysis of the dibenzoate ester (Daicel Chiralcel<sup>®</sup> OD-H, 100:1 hexane:*i*-PrOH, 1.0 mL / min, 254 nm, *t*<sub>SS</sub>(major) = 13.3 min, *t*<sub>RS</sub>(minor) = 15.6 min, *t*<sub>RR</sub>(minor) = 19.1 min).

**Nonamethylene-(*S,S*)-bis(3,3,3-trifluorolactate) [(*S,S*)-3f]:** 71% yield. Colourless crystal. Mp 48-49 °C. IR (KBr): 3444, 2940, 1752, 1740, 1344, 1280, 1228, 1132 cm<sup>-1</sup>. <sup>1</sup>H NMR (CDCl<sub>3</sub>): δ 4.48 (quintet, *J* = 7.2 Hz, 2H), 4.35 (dt, *J*<sub>1</sub> = 10.5 Hz, *J*<sub>2</sub> = 6.6 Hz, 2H), 4.29 (dt, *J*<sub>1</sub> = 10.5 Hz, *J*<sub>2</sub> = 6.6 Hz, 2H), 3.44 (d, *J* = 7.8 Hz, 2OH), 1.71 (quintet, *J* = 6.9 Hz, 4H), 1.25-1.40 (brs, 10H). <sup>19</sup>F NMR (CDCl<sub>3</sub>): δ 85.0 (d, *J* = 6.9 Hz, 6F). <sup>13</sup>C NMR (CDCl<sub>3</sub>): δ 167.5, 122.2 (q, *J* = 281 Hz), 69.8 (q, *J* = 33.2 Hz), 67.7, 29.1, 28.8, 28.2, 25.4; MS: *m/z* 145 (1), 125 (5), 124 (6), 96 (23), 95 (15), 83 (41), 82 (34), 81 (23), 69 (100), 68 (37), 67 (34), 57 (19), 56 (13), 55 (84), 54 (26), 43 (15), 42 (11), 41 (45); Anal. Calcd for C<sub>15</sub>H<sub>22</sub>F<sub>6</sub>O<sub>6</sub>: C 43.69, H 5.38, Found: C 43.72, H 5.34.  $[\alpha]^{25}_{\text{D}}$  -3.93 (*c* 1.1, acetone).

**Decamethylene-(*S,S*)-bis(3,3,3-trifluorolactate) [(*S,S*)-3g]:** 90% yield. Colourless crystal. Mp 56 °C. IR (KBr): 3440, 1752, 1748, 1467, 1344, 1224, 1190, 1130 cm<sup>-1</sup>. <sup>1</sup>H NMR (CDCl<sub>3</sub>): δ 4.47 (q, *J* = 6.9 Hz, 2H), 4.35 (dt, *J*<sub>1</sub> = 10.8 Hz, *J*<sub>2</sub> = 6.6 Hz, 2H), 4.29 (dt, *J*<sub>1</sub> = 10.5 Hz, *J*<sub>2</sub> = 6.6 Hz, 2H), 3.41 (d, *J* = 7.5 Hz, 2OH), 1.71 (quintet, *J* = 7.2 Hz, 4H), 1.25-1.43 (brs, 12H). <sup>19</sup>F NMR

(CDCl<sub>3</sub>):  $\delta$  85.0 (d,  $J = 6.9$  Hz, 6F). <sup>13</sup>C NMR (CDCl<sub>3</sub>):  $\delta$  167.6, 122.3 (q,  $J = 282$  Hz), 69.8 (q,  $J = 33.3$  Hz), 67.7, 29.2, 28.9, 28.2, 25.4. MS:  $m/z$  145 (2), 138 (4), 110 (14), 97 (22), 96 (22), 95 (17), 83 (60), 82 (37), 81 (25), 69 (57), 68 (36), 67 (32), 57 (22), 56 (15), 55 (100), 54 (28), 43 (21), 42 (13), 41 (53); Anal. Calcd for C<sub>16</sub>H<sub>24</sub>F<sub>6</sub>O<sub>6</sub>: C 45.07, H 5.67, Found: C 45.2, H 5.57.  $[\alpha]_D^{25} -3.78$  (*c* 1.1, acetone).

**Fig. 1S** ORTEP plots for **3** at 50% probability level. Disordered moieties are omitted for clarity.

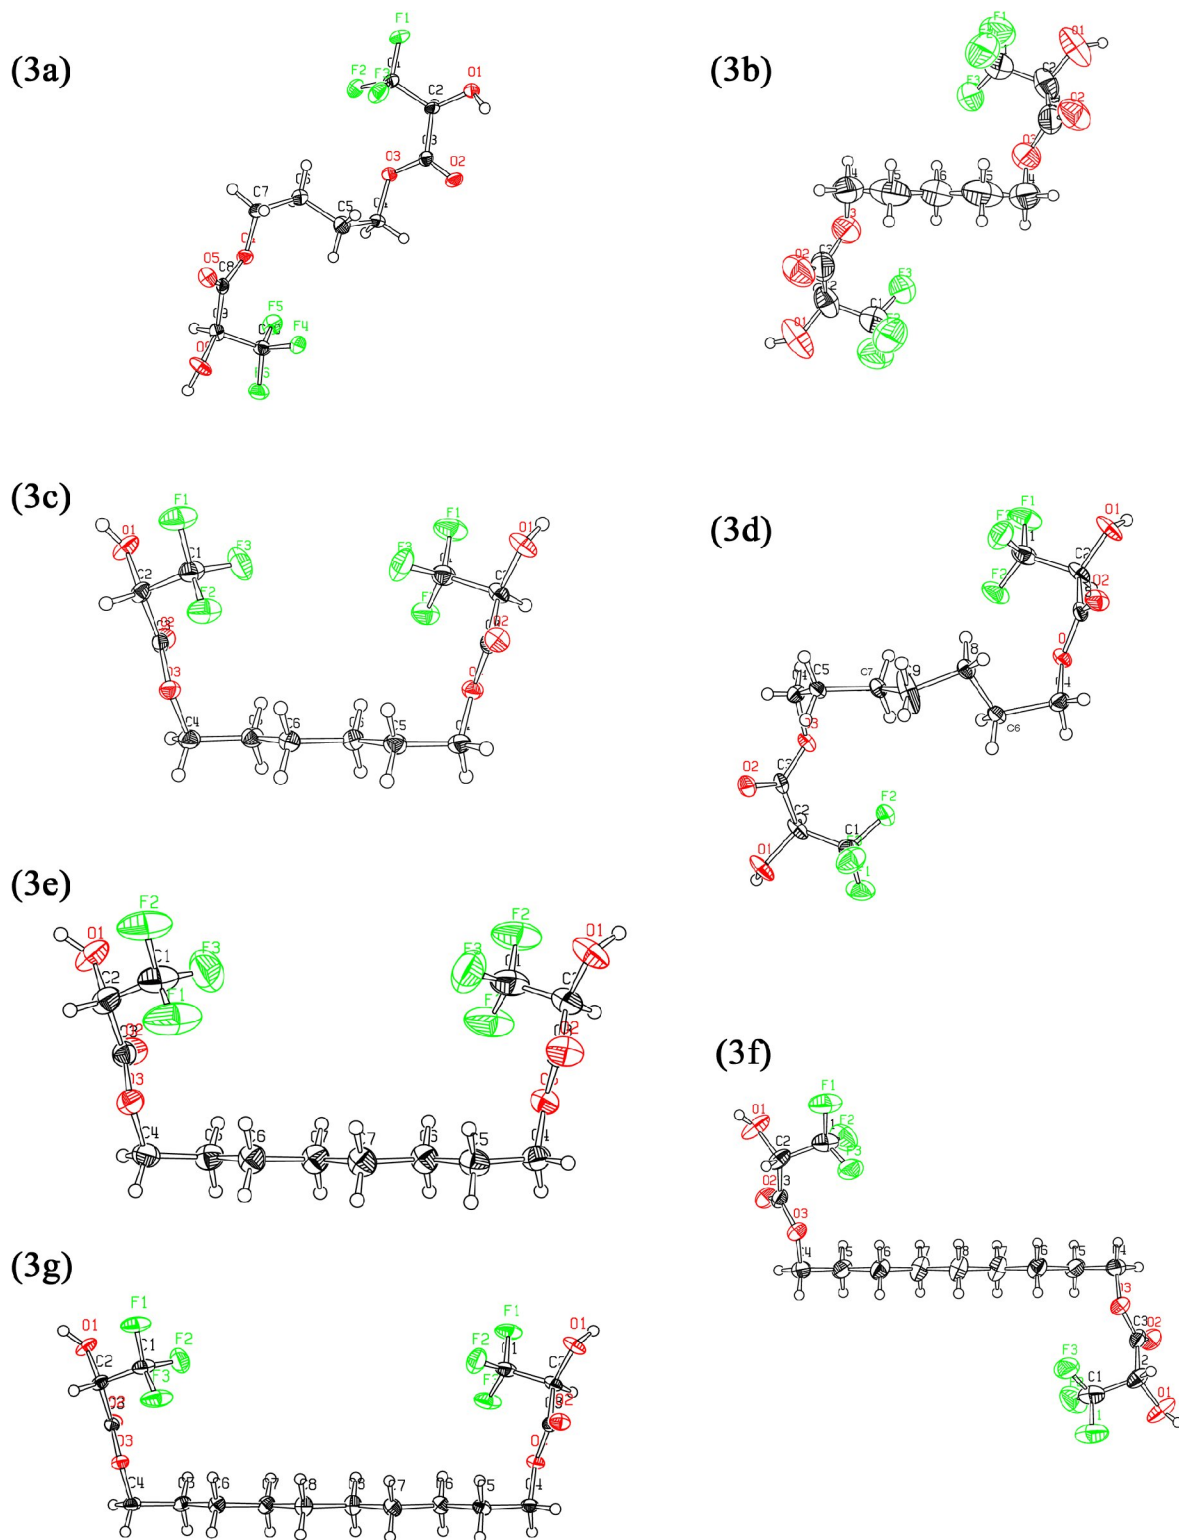

**Fig. 2S** Crystal structure of **3**. H-atoms of methylene groups and disordered moieties are omitted for clarity. Hash bonds are hydrogen bonds.

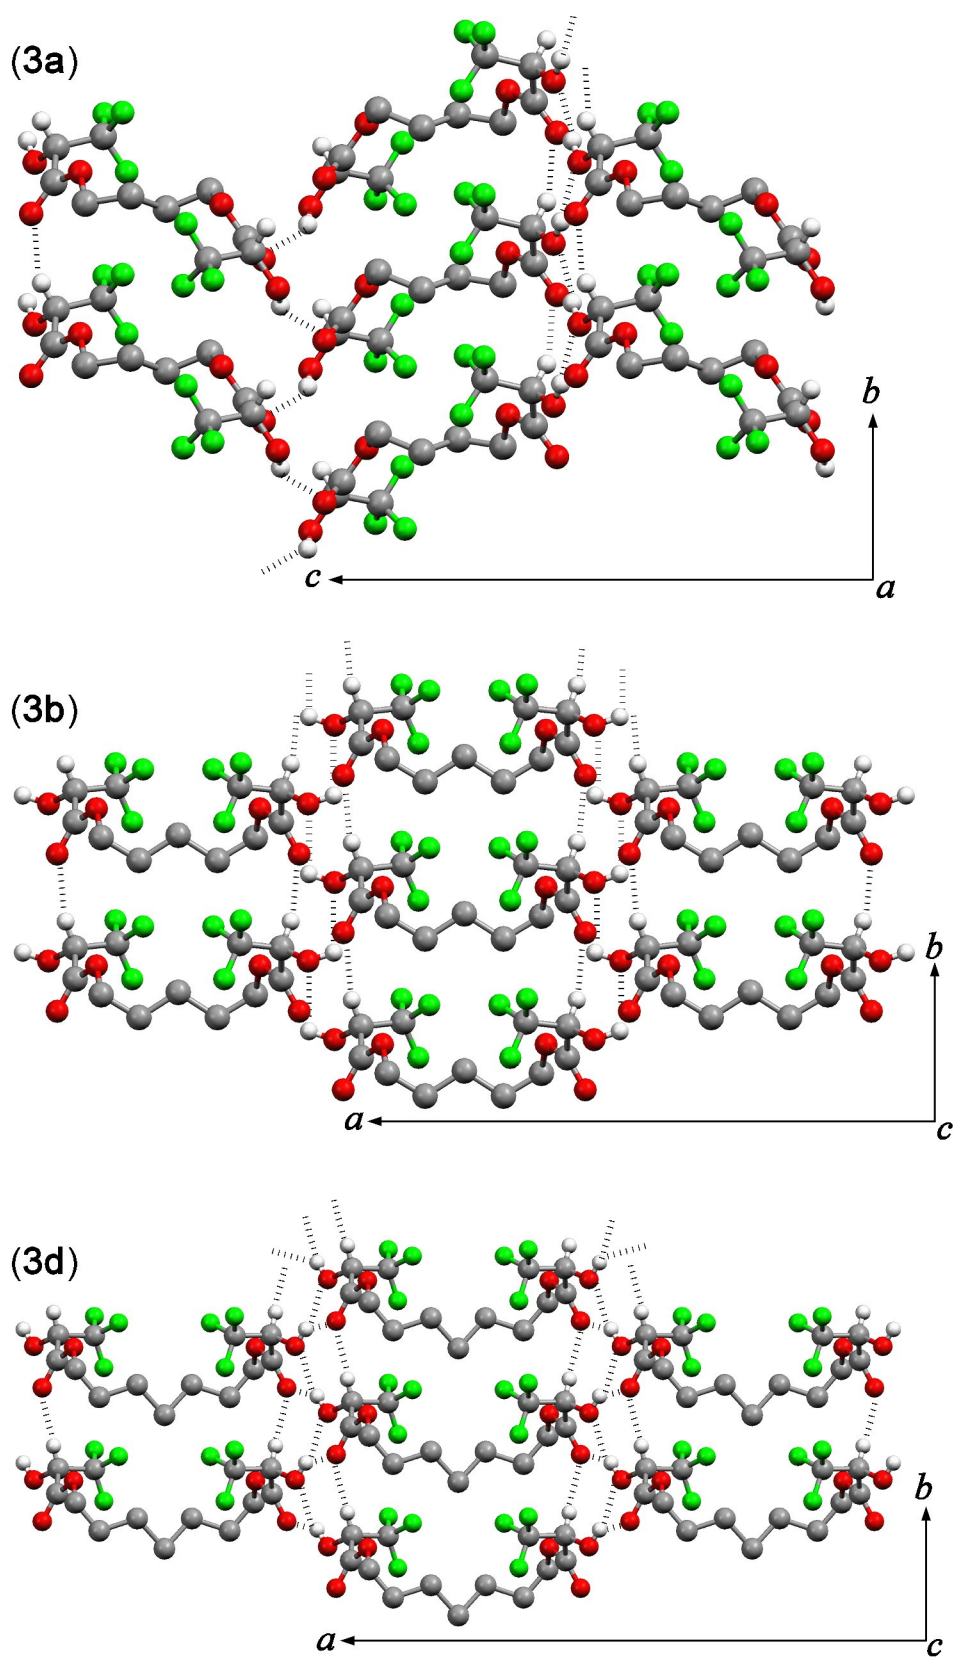

Fig. 2S Crystal structures of **3** (continued).

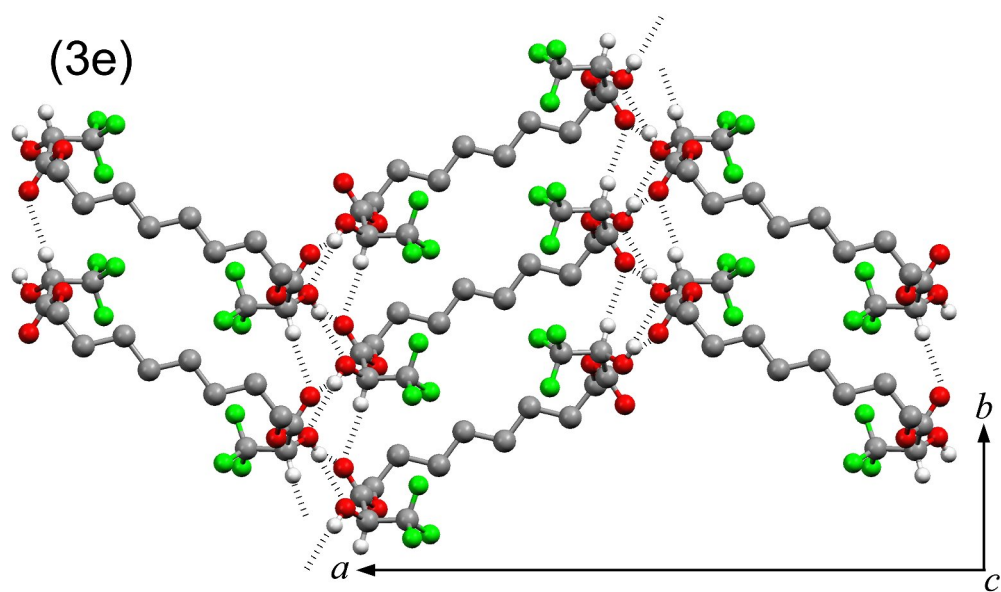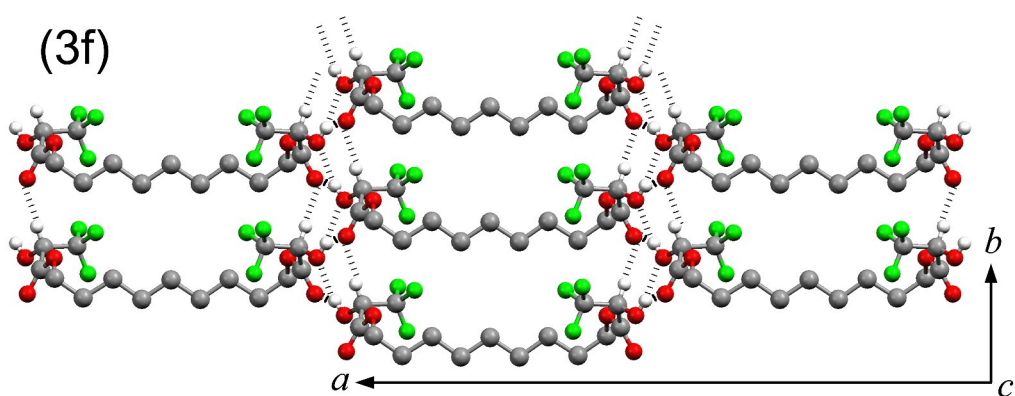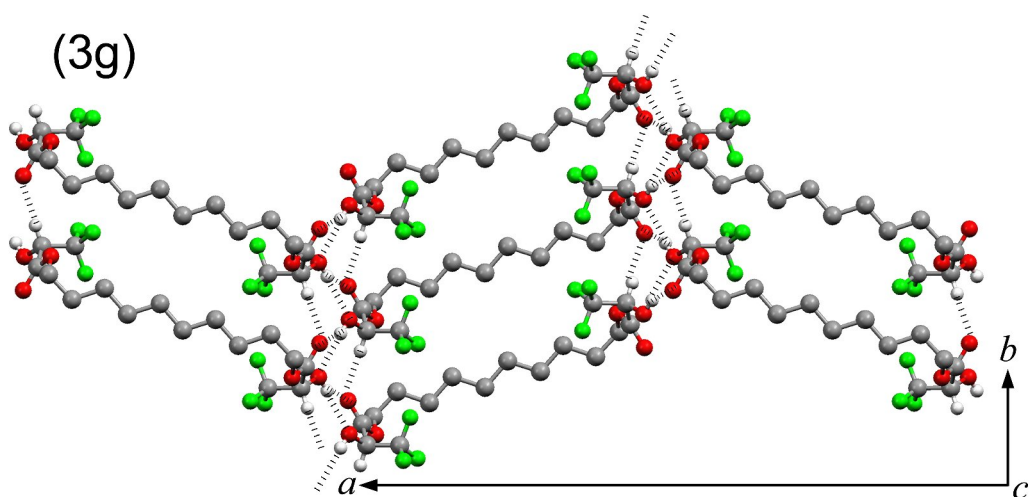

**Fig. 3S**  $^1\text{H}$  NMR chart of **3f** which crystallized from octane/THF (in  $\text{CDCl}_3$ )

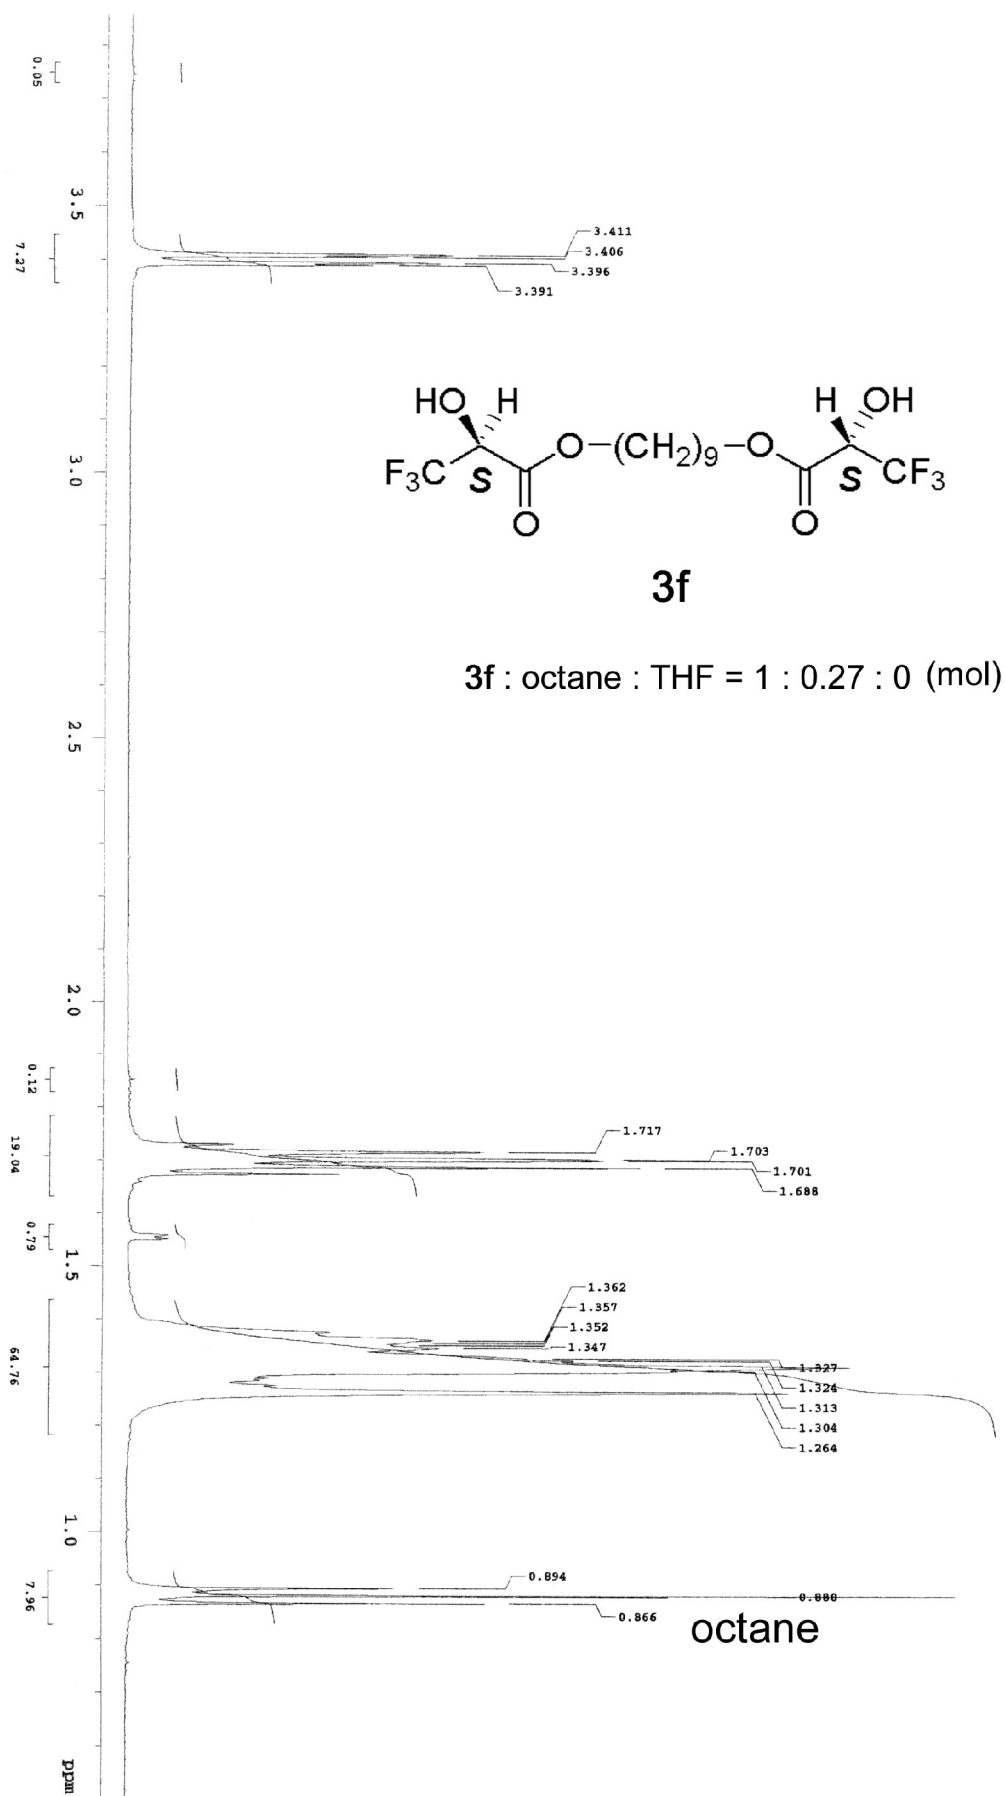



**Fig. 4S**  $^1\text{H}$  NMR spectra of **4f** which crystallized from hexane/ether (in  $\text{CDCl}_3$ )

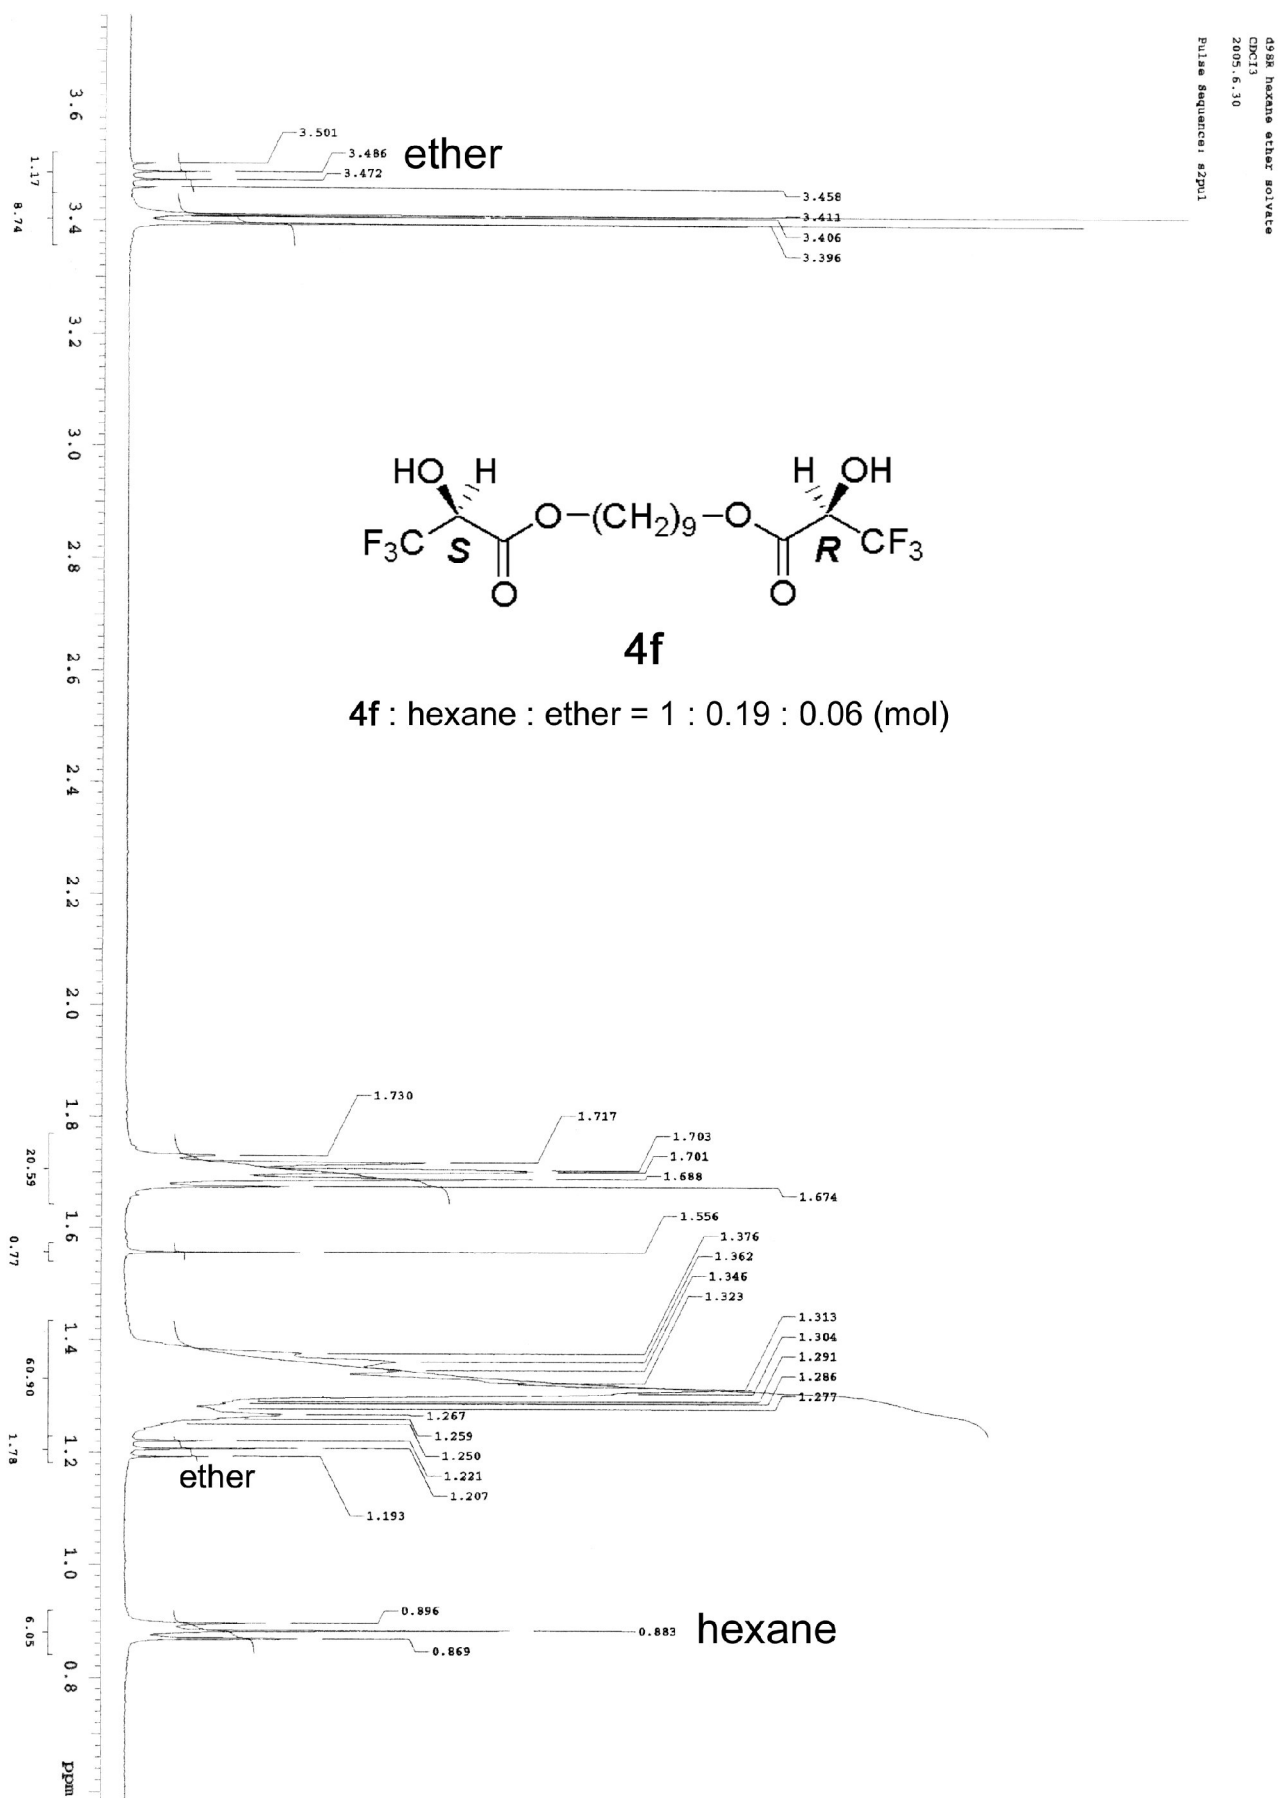

**Fig. 5S**  $^1\text{H}$  NMR spectra of **3g** which crystallized from hexane/ether (in  $\text{CDCl}_3$ )

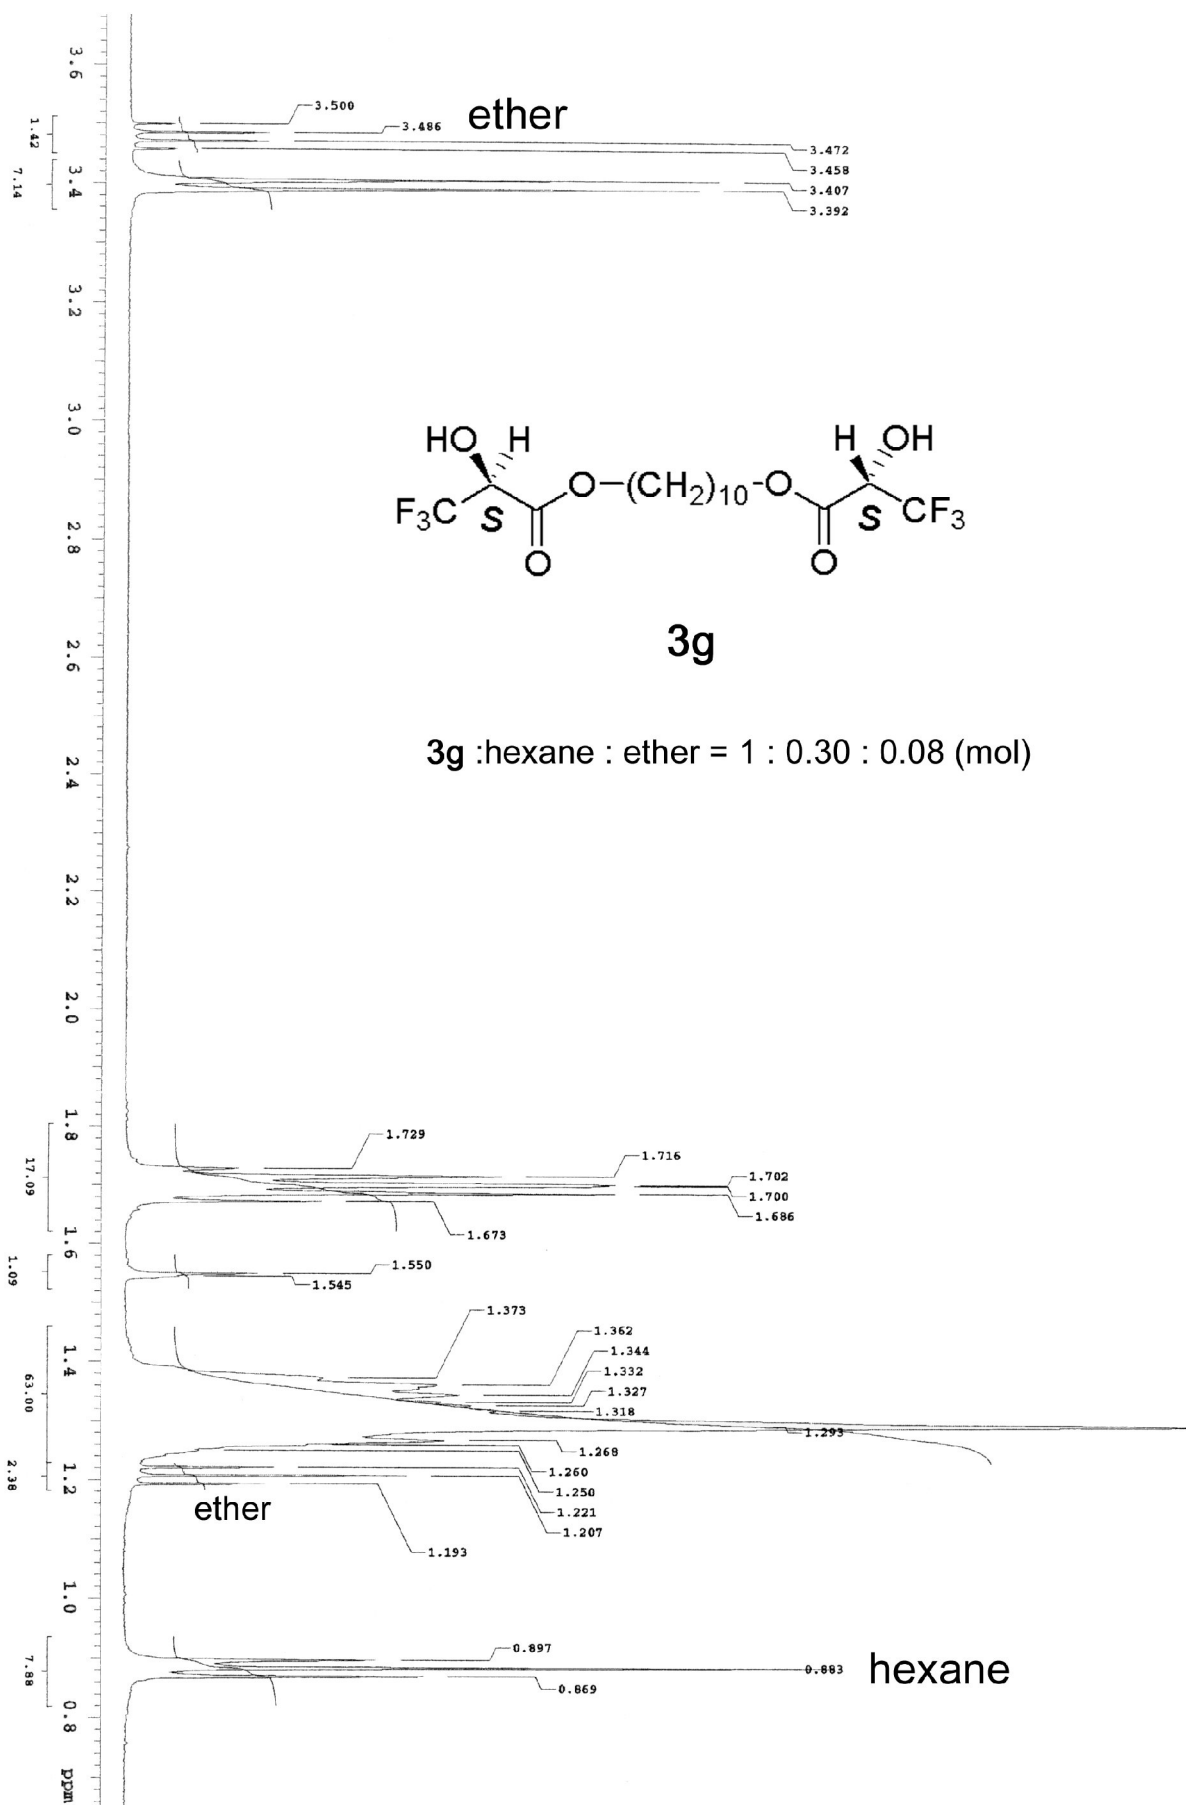

**Fig. 6S** TG curves for **3f**, **4f** and **3g** crystals which included some crystallization solvents. Undesirable decomposition of the fluorine compounds with generation of heat was occurred over 140 °C, so TG analysis was stopped at 145 °C.

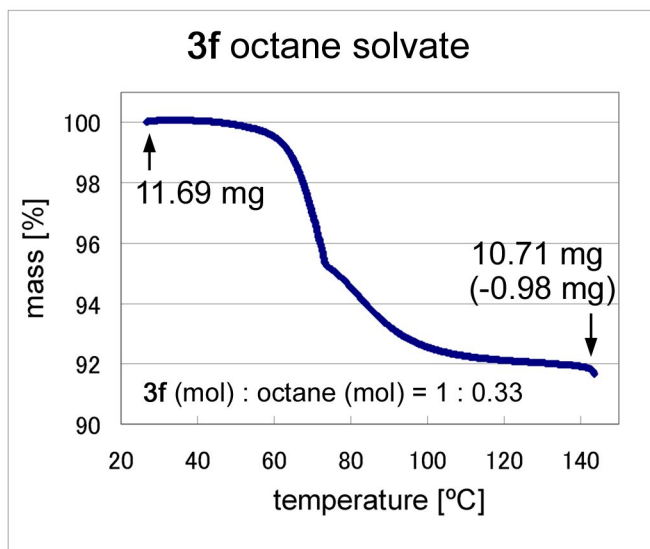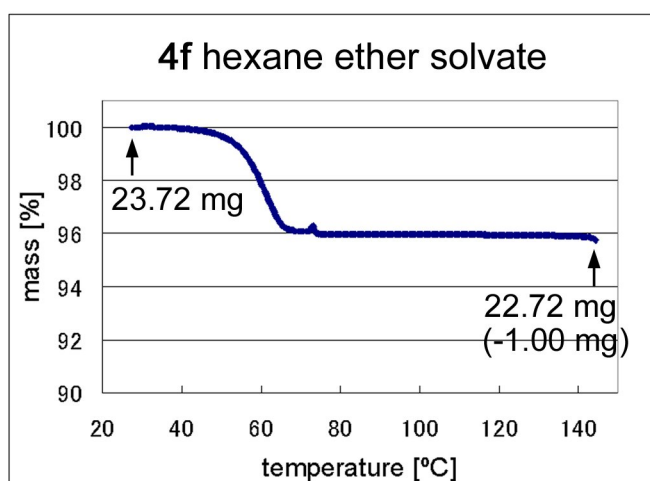

4f (mol) : (hexane+ether) (mol) = 1 : 0.21~0.25

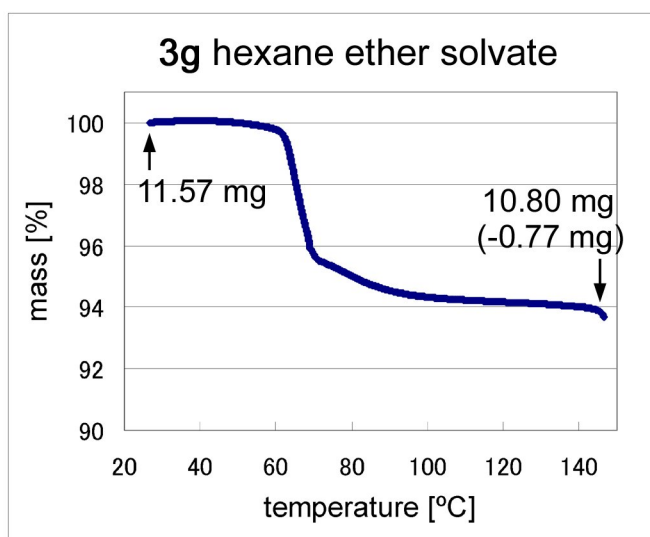

3g (mol) : (hexane+ether) (mol) = 1 : 0.35~0.40
